# Supplementary material
Source: publisher figshare collection journal article supplement (https://plos.figshare.com/articles/dataset/_/11475516)
Supplement: Supplementary file 1 [file 1]

Archive with 14 entries (14 files):
- pmed.1003001.s001.doc
- pmed.1003001.s002.docx
- pmed.1003001.s003.docx
- pmed.1003001.s004.docx
- pmed.1003001.s005.docx
- pmed.1003001.s006.docx
- pmed.1003001.s007.docx
- pmed.1003001.s008.docx
- pmed.1003001.s009.docx
- pmed.1003001.s010.pdf
- pmed.1003001.s011.pdf
- pmed.1003001.s012.docx
- pmed.1003001.s013.docx
- pmed.1003001.s014.docx
