# Supplementary material
Source: publisher figshare collection journal article supplement (https://plos.figshare.com/articles/dataset/_/11475516)
Supplement: Supplementary file 1 [file 1 › pmed.1003001.s006.docx]

**S4_Table**

**Reasons why study drug was not given**

| Reasons study drug not given | **Nitroglycerin N=542** | **Placebo**  **N=562** |
| --- | --- | --- |
|  | 6/542 (1.1) | 7/562 (1.2) |
| Placenta was delivered before drug was administered1 | 0 | 4 |
| Systolic blood pressure ≤100 mmHg1 | 2 | 1 |
| Systolic blood pressure ≤100 mmHg and pulse >119bpm1 | 2 | 0 |
| Pulse >119bpm1 | 0 | 1 |
| Bleeding1 | 1 | 1 |
| Medical team wrongly assuming spray had been given | 1 | 0 |

1Observations taken immediately before drug administration meant that the woman was no longer

eligible for trial inclusion. Drug was not given on safety grounds.
