# Supplementary material
Source: publisher figshare collection journal article supplement (https://plos.figshare.com/articles/dataset/_/11475516)
Supplement: Supplementary file 1 [file 1 › pmed.1003001.s007.docx]

**S5_Table**

**Method of placenta removal**

|  | **Nitroglycerin**  **N=541** | **Placebo**  **N=563** |
| --- | --- | --- |
| **Placenta delivered within 15 minutes** |  |  |
| Spontaneous | 5/36 (13.9) | 6/45 (13.3) |
| Controlled cord traction | 31/36 (86.1) | 39/45 (86.7) |
| **Placenta delivered after 15 minutes** |  |  |
| Spontaneous | 13/505 (2.6) | 16/518 (3.1) |
| Controlled cord traction | 83/505 (16.4) | 84/518 (16.2) |
| Manual removal of placenta | 407/505 (80.6) | 417/518 (80.5) |
| Other1 | 1/505 (0.2) | 1/518 (0.2) |
| Unknown2 | 1/505 (0.2) |  |

1Suction removal; removed with uterus at hysterectomy. 2Participant was discharged with placenta still inside
