# Supplementary material
Source: publisher figshare collection journal article supplement (https://plos.figshare.com/articles/dataset/_/11475516)

S1 Figure


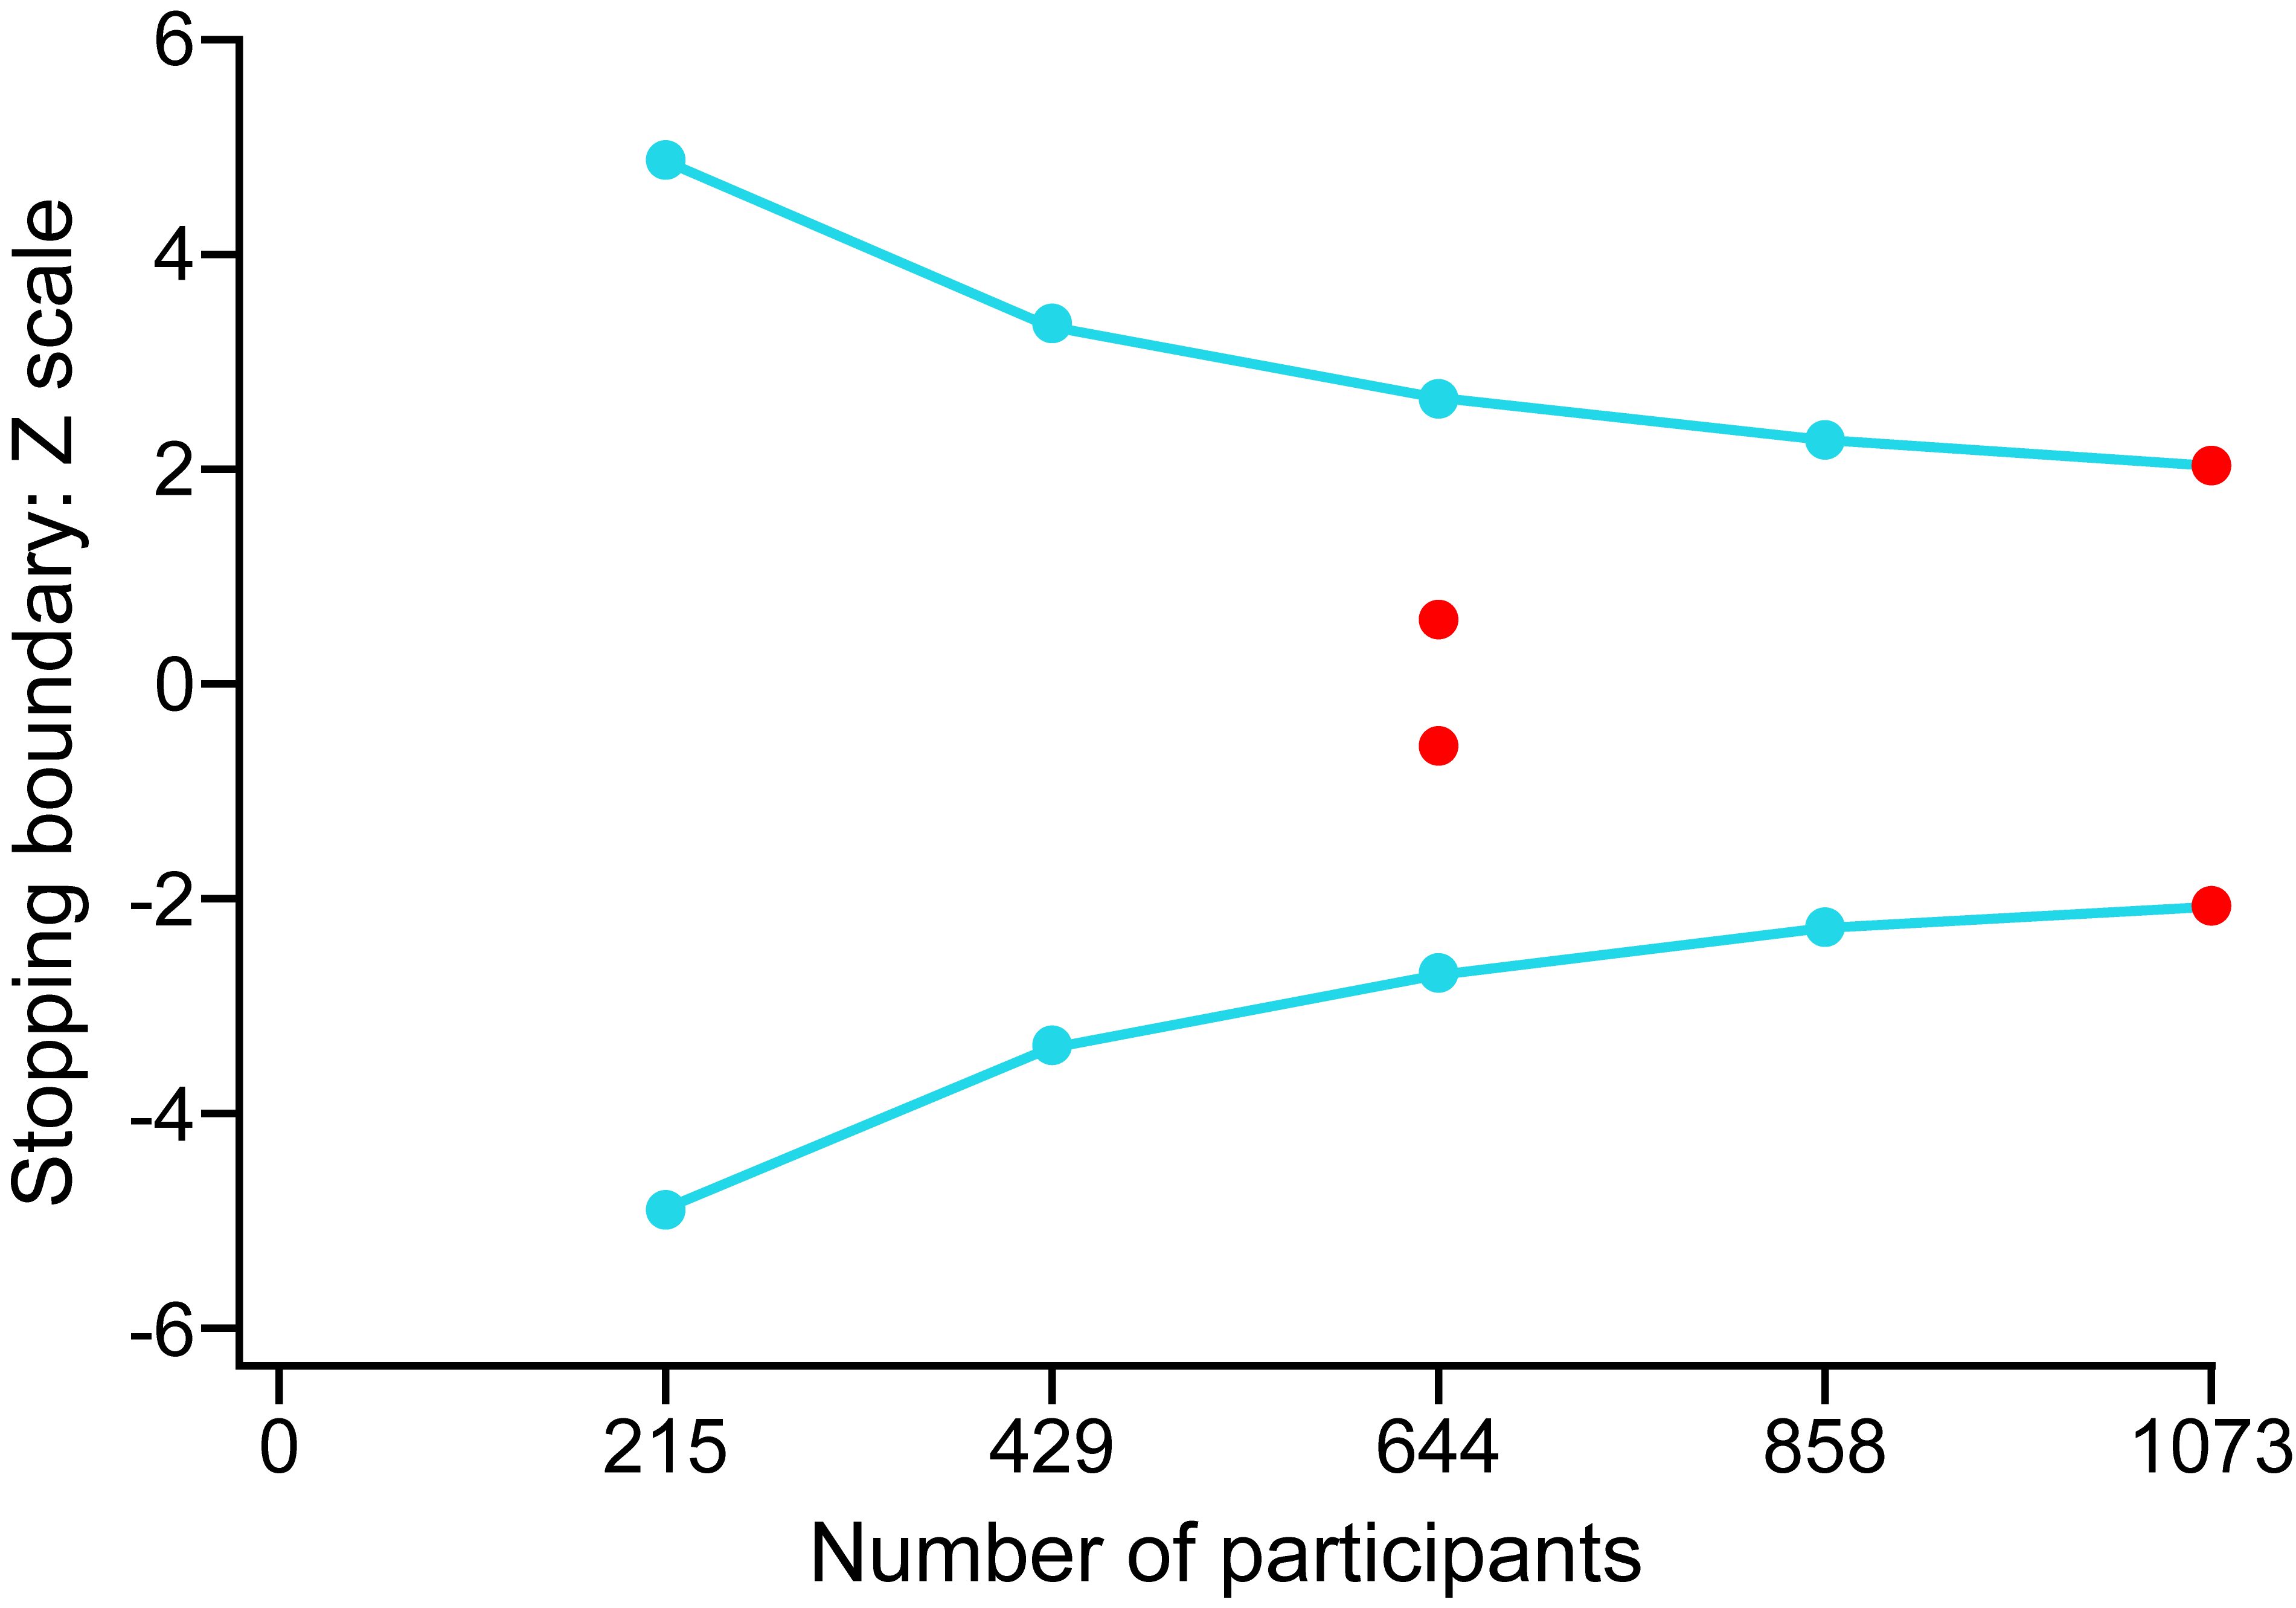
**Stopping boundaries**

Blue: efficacy boundaries; red: futility boundaries

Supplement: Supplementary file 1 [file 1 › pmed.1003001.s002.docx]
